# Supplementary material
Source: publisher site journal article supplement (https://www.dovepress.com/article/505657)
Supplement: Supplementary file 1 [file get_supplementary_file.php]

**Supplementary** **Table 1** Comparison of model performance metrics

|  | MSE | RMSE | MAE | R-squared |
| --- | --- | --- | --- | --- |
| Linear regression | 0.087 | 0.295 | 0.212 | 0.528 |
| Decision tree | 0.082 | 0.287 | 0.212 | 0.553 |
| Random forest | 0.039 | 0.197 | 0.143 | 0.790 |

MSE: mean squared error; RMSE: root mean squared error; MAE: mean absolute error.
